# Supplementary material for: Artificial polyhydroxyalkanoate poly[2-hydroxybutyrate-block-3-hydroxybutyrate] elastomer-like material
Source: Research Square preprint supplement (doi:10.21203/rs.3.rs-764923/v1), 2021-08-05
Supplement: Supplementary file [file 32ae7b1c3d81fdd2d42de7aa.pdf]

*Supplementary information*

*for*

**Artificial polyhydroxyalkanoate poly[2-hydroxybutyrate-block-3-hydroxybutyrate] elastomer-like material**

**Yuki Kageyama, Hiroya Tomita, Takuya Isono, Toshifumi Satoh and  
Ken'ichiro Matsumoto\***

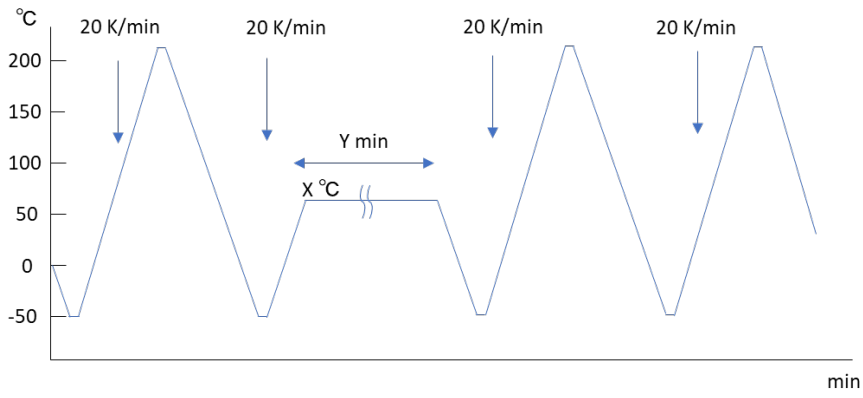

**Figure S1.** Heating and cooling cycles for annealing of the films, where  $X = 50$  or  $70$  and  $Y = 720$ .

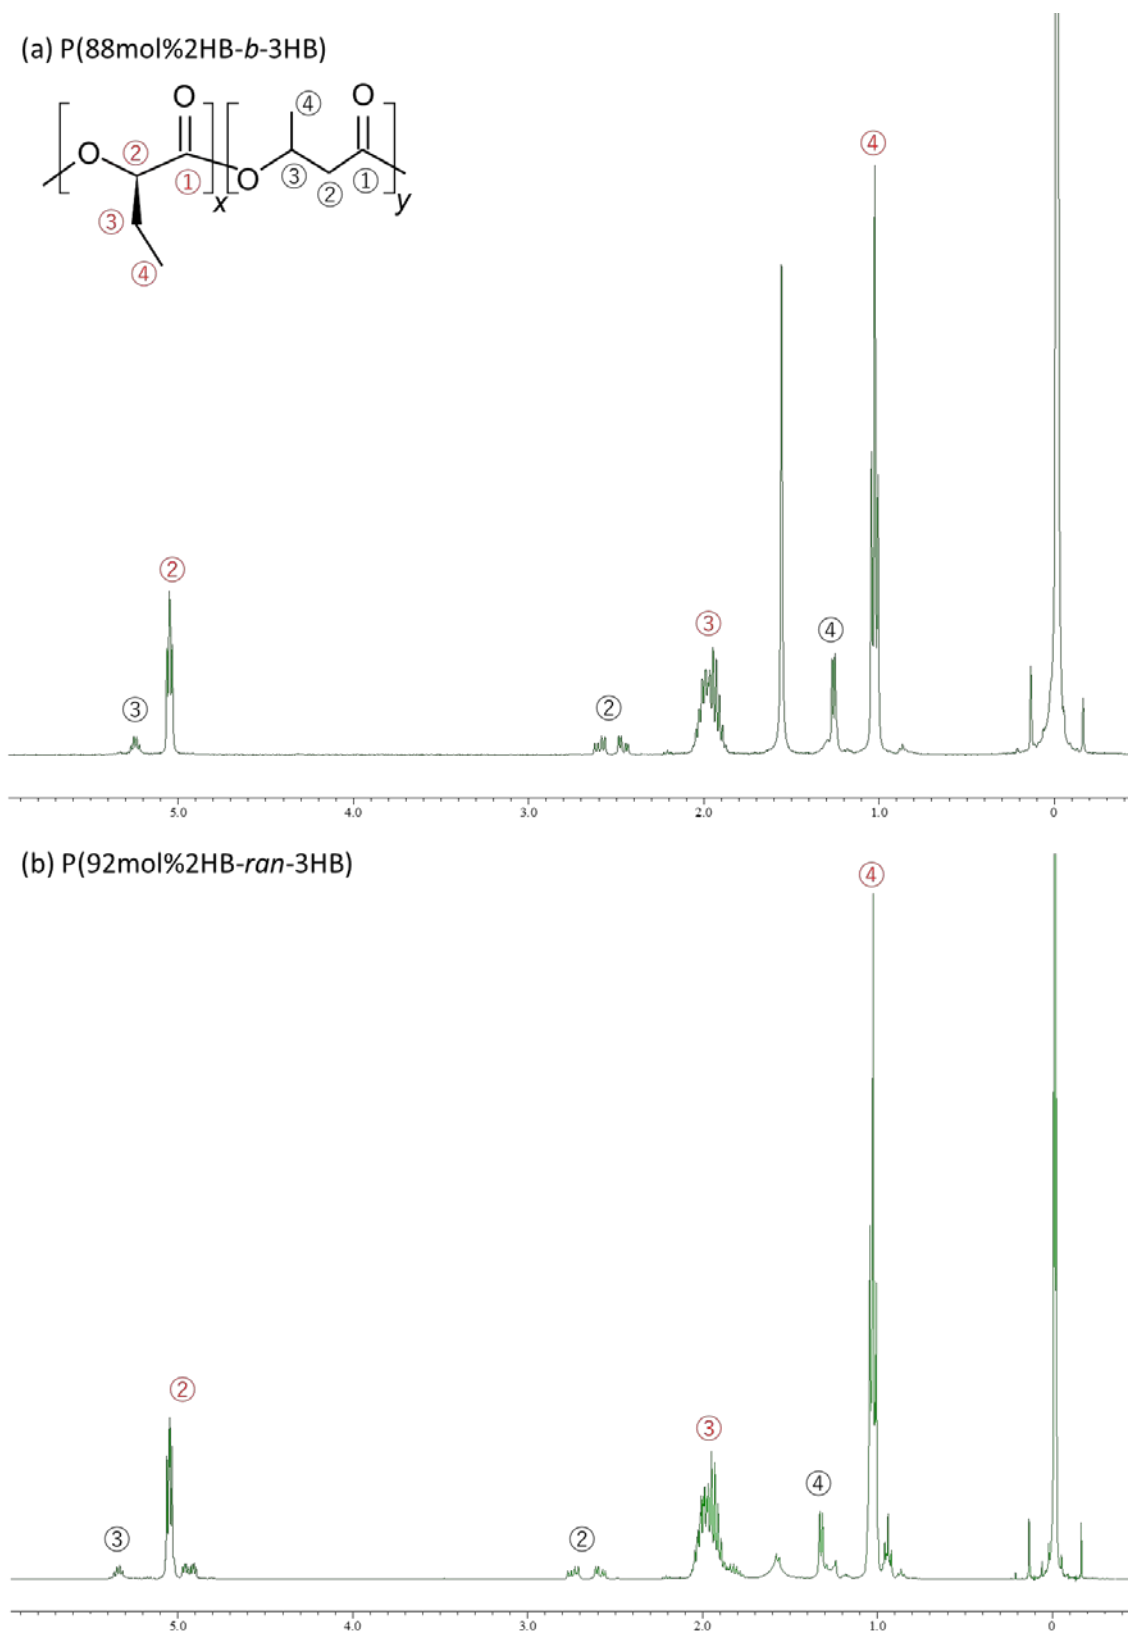

**Figure S2.**  $^1\text{H}$  NMR spectra of the P(2HB-*co*-3HB) polymers synthesized in *E. coli*. (a) P(88 mol% 2HB-*b*-3HB) synthesized using PhaC<sub>AR</sub> and (b) P(92 mol% 2HB-*ran*-3HB) synthesized using PhaC1<sub>Ps</sub>STQK.

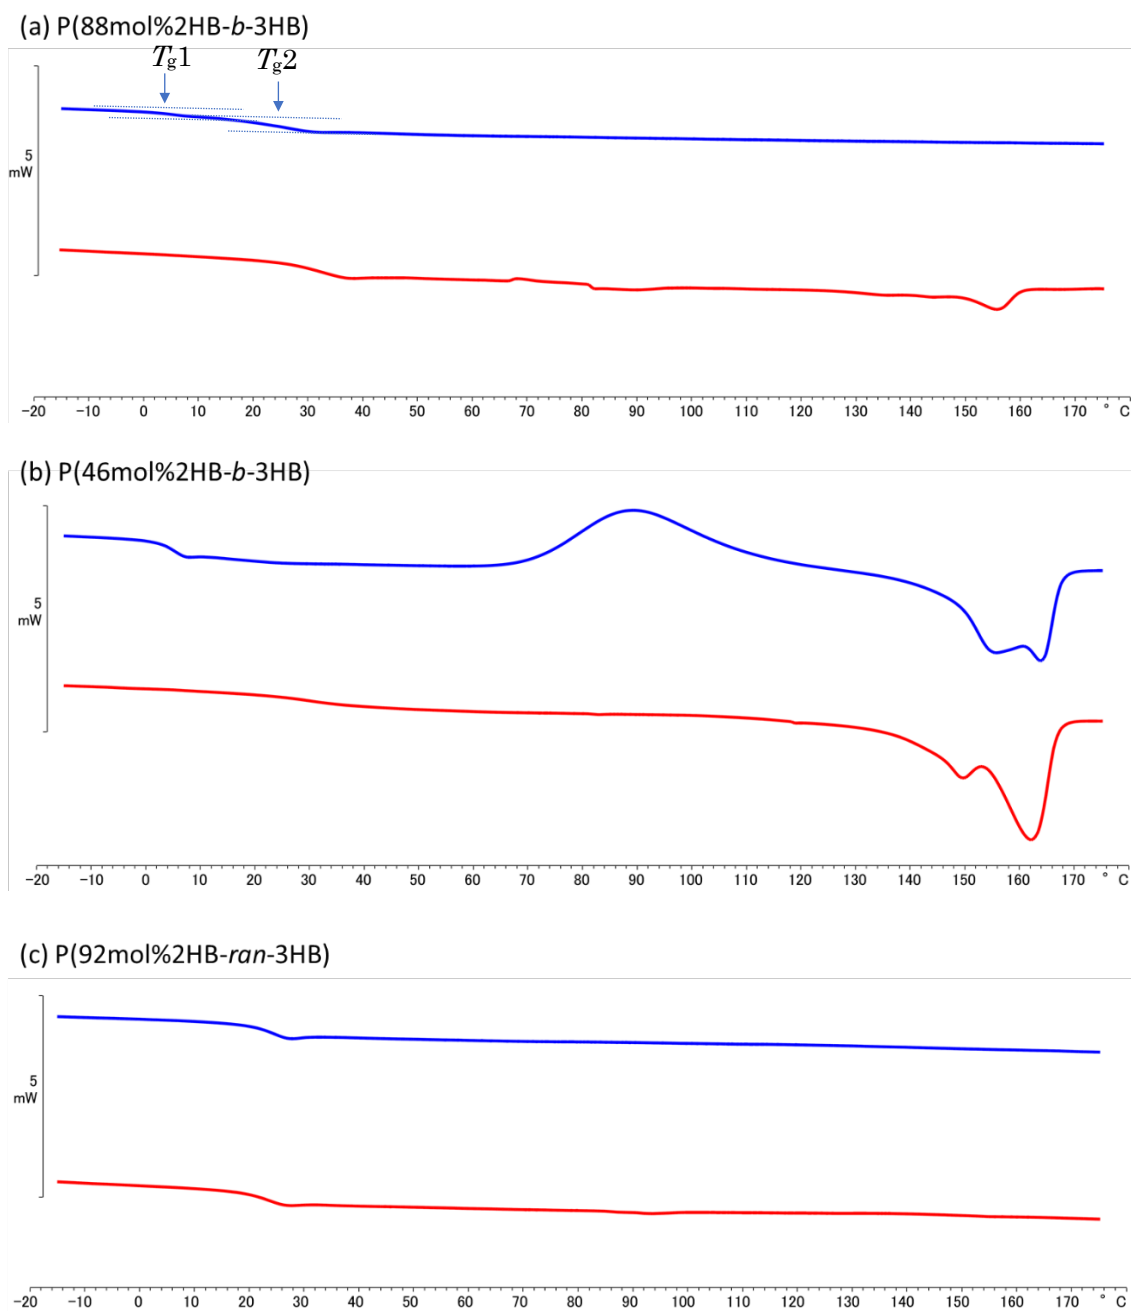

**Figure S3.** DSC thermograms of solvent-cast films of the P(2HB-*co*-3HB) polymers. First (red) and second (blue) heating scans were recorded for (a) P(88 mol% 2HB-*b*-3HB), (b) P(46 mol% 2HB-*b*-3HB), and (c) P(92 mol% 2HB-*ran*-3HB).

**Table S1. Exploration of the annealing conditions of the P(88 mol% 2HB-*b*-3HB) film for promoting crystallization**

| Annealing temperature (°C) | Annealing time (h) | $T_m$ (°C) |        | $\Delta H_m$ (J/g) |        |
|----------------------------|--------------------|------------|--------|--------------------|--------|
|                            |                    | P(2HB)     | P(3HB) | P(2HB)             | P(3HB) |
| -                          | -                  | ND         | 155.5  | ND                 | 8.25   |
| 50                         | 12                 | 91.9       | 159.16 | 4.75               | 1.02   |
| 70                         | 12                 | 100.2      | 159.16 | 2.7                | 11.2   |
| 50                         | 6                  | 95.6       | 148.9  | 13.8               | 10.7   |
| 70                         | 6                  |            |        |                    |        |
| 70                         | 6                  | 100.2      | 149.8  | 2.58               | 11.7   |
| 70                         | 24                 | 100.5      | 148.8  | 3.04               | 11.6   |

Annealing was performed in a DSC machine.

(a) P(88 mol% 2HB-*b*-3HB)

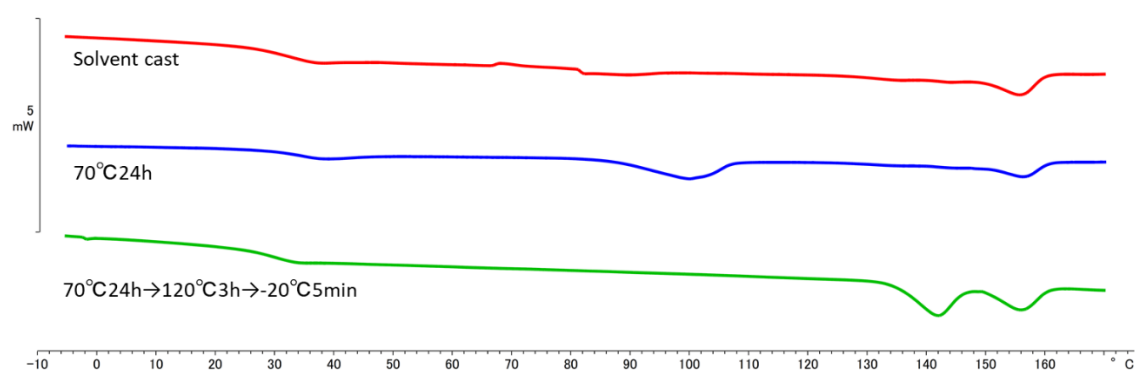

(b) P(46 mol% 2HB-*b*-3HB)

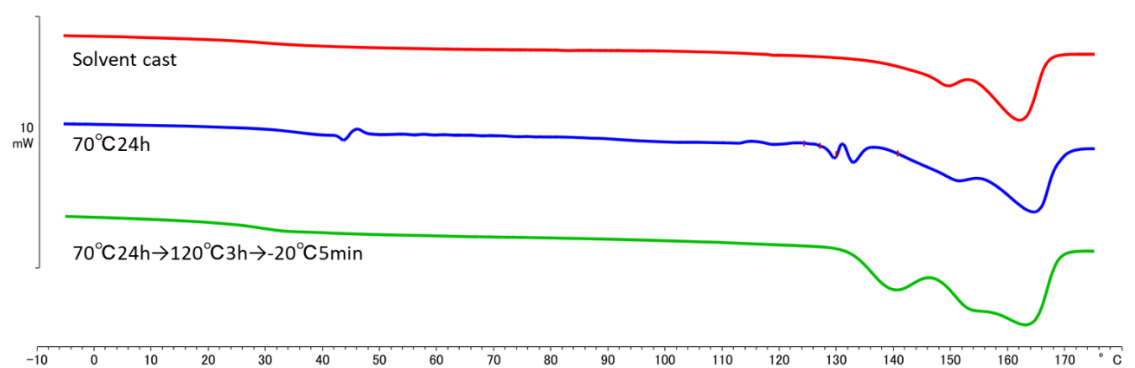

**Figure S4.** DSC thermograms of annealed P(88 mol% 2HB-*b*-3HB) (a) and P(46 mol% 2HB-*b*-3HB) (b) in a heat press machine.
